# Supplementary material for: Polydopamine-coated bimetallic ZIF derivatives as a H2O2-free oxidase mimetic for the colorimetric sensing of l-cysteine
Source: Royal Society of Chemistry journal article supplement (doi:10.1039/d3nj05036j), 2024-01-01
Supplement: d3nj05036j1.pdf [file d3nj05036j1.pdf]

**Supporting Information**

**Polydopamine-coated bimetallic ZIF derivatives as a H<sub>2</sub>O<sub>2</sub>-free oxidase mimetic for the  
colorimetric sensing of L-cysteine**

Ran Zhang, Shaohong Zhang, Junhao Lu, Ying Wu, Jinjin Zhao, Zhijuan Wang\*

*Institute of Advanced Synthesis (IAS), School of Chemistry and Molecular Engineering (SCME),  
Jiangsu National Synergetic Innovation Center for Advanced Materials (SICAM), Nanjing Tech  
University, 30 South Puzhu Road, Nanjing 211816, PR China*

E-mail: [ias\\_zjwang@njtech.edu.cn](mailto:ias_zjwang@njtech.edu.cn)

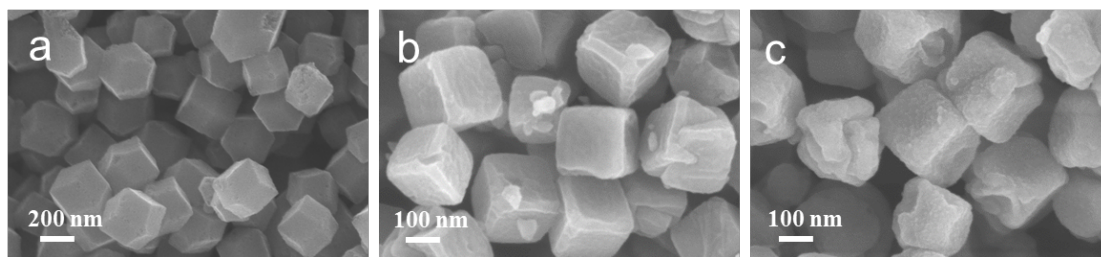

**Fig. S1.** SEM images of (a) ZIF-8, (b) Co-Zn ZIFs and (c) Co-Zn ZIFs@PDA.

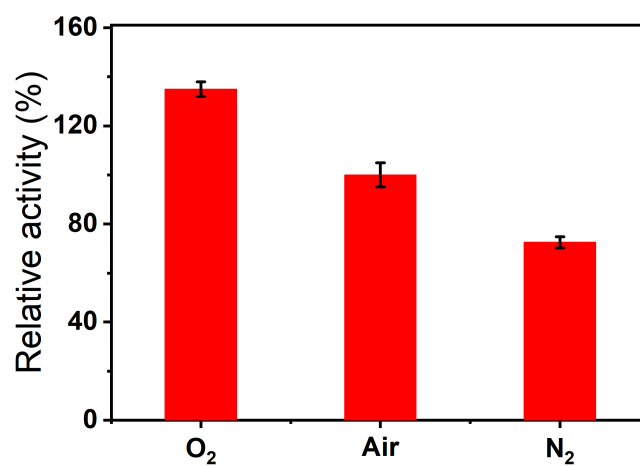

**Fig. S2.** Effects of O<sub>2</sub>, Air, and N<sub>2</sub> on the oxidase-like catalytic property of Co-HPNC@NC.

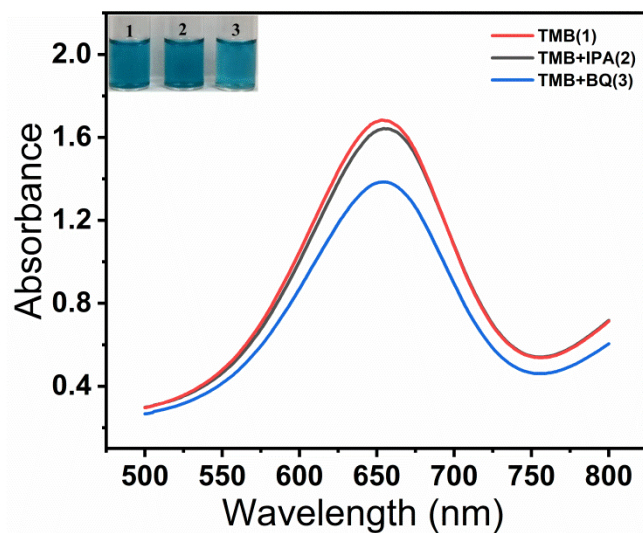

**Fig. S3.** UV-vis absorption spectra of TMB (1) and TMB with isopropanol (2) and p-benzoquinone (3), respectively. Inset: color contrast photograph of the above three systems. Reaction conditions: 0.3 mg mL<sup>-1</sup> catalyst, 10 mM isopropanol/p-benzoquinone, 0.01 M acetate buffer (pH=3.5), 4 mM TMB, 30 □ for 10 min incubation.

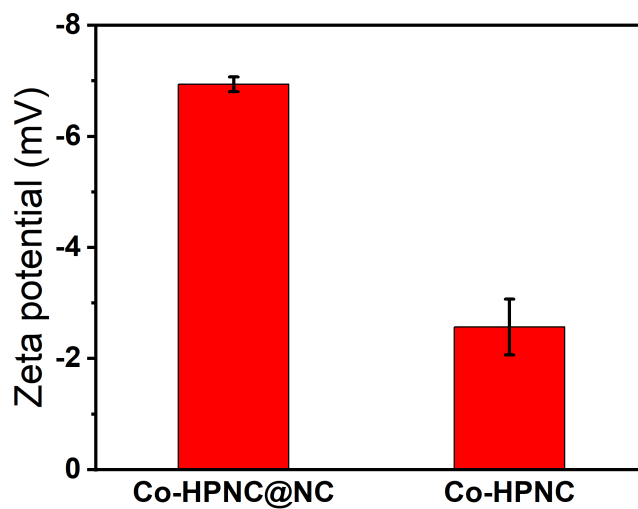

**Fig. S4.** The zeta potential of Co-HPNC@NC, Co-HPNC at pH=3.5.

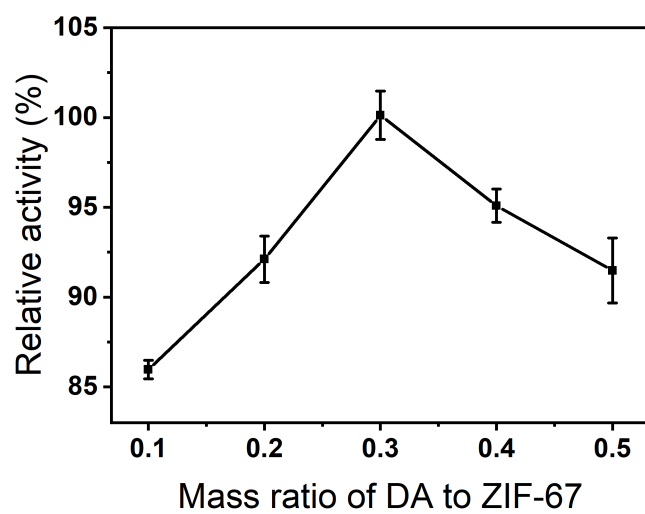

**Fig. S5.** The relative activity of the mass ratio of DA to ZIF-67.

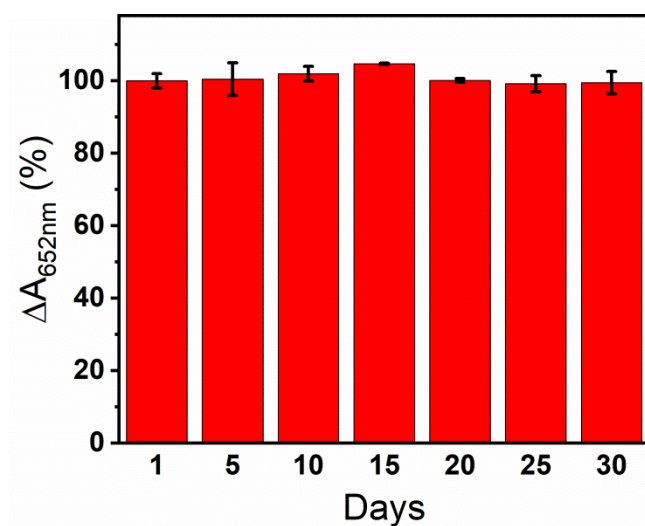

**Fig. S6.** The storage stability of Co-HPNC@NC after dispersing in 0.01 M acetic acid buffer solution and storing in a refrigerator at 4 °C for one month. Reaction conditions: 0.3 mg mL<sup>-1</sup> catalyst, 0.01 M acetate buffer (pH=3.5), 4 mM TMB, 30 min for 10 min incubation.

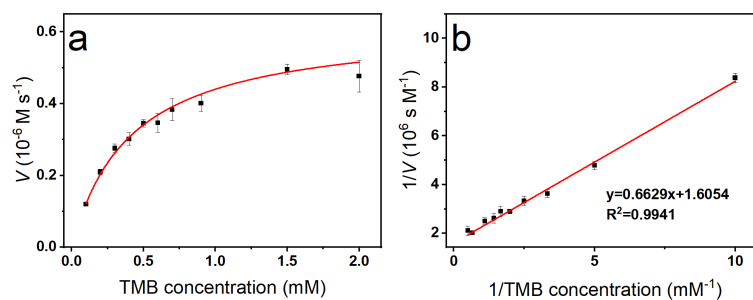

Fig. S7. (a) Steady-state kinetic assay of Co-HPNC@NC; (b) Double-reciprocal plot of Co-HPNC@NC at a fixed concentration ( $0.3 \text{ mg mL}^{-1}$ ,  $100 \text{ }\mu\text{L}$ ) versus the varying concentration of TMB (0.1, 0.2, 0.3, 0.4, 0.5, 0.6, 0.7, 0.9, 1.5 and 2.0 mM). Conditions: acetate buffer (0.01 M, pH=3.5, 1.8 mL). The mixture was incubated at  $30 \text{ }^\circ\text{C}$  for 10 min. Error bars denote standard deviations based on 3 measurements.
